# Supplementary material for: Electrospun polyacrylonitrile nanofibers supported alloyed Pd–Pt nanoparticles as recyclable catalysts for hydrogen generation from the hydrolysis of ammonia borane
Source: Royal Society of Chemistry journal article supplement (doi:10.1039/c5ra18698f), 2015-01-01
Supplement: c5ra18698f1.pdf [file c5ra18698f1.pdf]

## Supporting Information

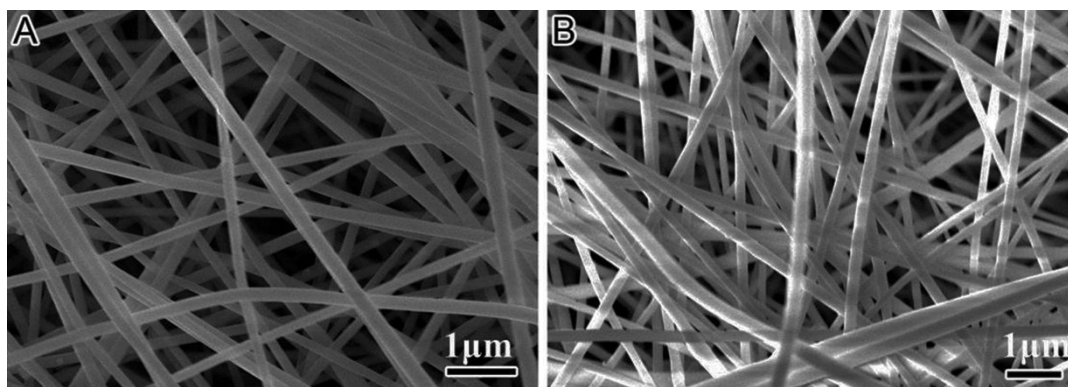

Fig. S1. SEM images of (A) electrospun PAN nanofibers, (B) glutaral-functional PAN nanofibers.

|                 | wt.% of Pd | wt.% of Pt |
|-----------------|------------|------------|
| PAN/Pd-Pt (3:1) | 7.8%       | 1.0%       |
| PAN/Pd-Pt (1:1) | 7.2%       | 1.6%       |
| PAN/Pd-Pt (1:3) | 6.6%       | 2.3%       |
| PAN/Pd          | 8.0%       | 0          |
| PAN/Pt          | 0          | 6.0%       |

Table S1. The weight percentages of Pd and Pt in the composite nanofibers.
